# Supplementary material
Source: Springer Nature journal article supplement (https://www.springermedizin.de/resource/supplementary/12911_2013_829_MOESM1_ESM.pdf/9526742)
Supplement: MOESM1 [file 9526742]

**Introduction:** Information about the decision aid, the condition, and the decision being considered

**Information about the options:** benefits and harms including pictographs for risk information

Benefit

*When using option 1, your pain will be relieved immediately*

Side-effect A .....

Detailed information ordered in pre-specified manner

**Value clarification exercise:**

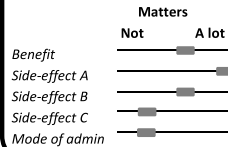

The results of the exercise are used to individualize future information. See Figure 3 for further explanation

**Summary information:**

| Criteria               | Option            |                    |                   |
|------------------------|-------------------|--------------------|-------------------|
|                        | 1                 | 2                  | 3                 |
| Benefit                | Small improvement | Medium improvement | Large improvement |
| Side-effect A          | Low risk          | Medium risk        | High risk         |
| Side-effect B          | Low risk          | Low risk           | Medium risk       |
| Side-effect C          | Low risk          | Medium risk        | Medium risk       |
| Mode of administration | None              | Pill               | Injection         |

Summary ordered in pre-specified manner, size of rows equal and no colour

**Information about the options and scoring:** benefits and harms including pictographs for risk information

Side-effect A

*When using option 1, about 2 in 100 (4%) fewer people like you (3 in 100 total) will experience side-effect A in the next 5 years compared to no treatment*

How important is this to you?

Not  Somewhat  Very

Benefit ..... etc

Information ordered in accordance of importance (e.g. Side-effect A first)

**Value clarification exercise:**

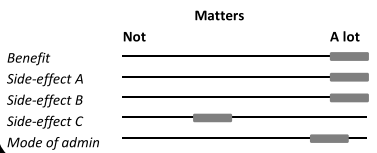

The exercise results do not influence future information

**Summary information and preferred option:**

| Criteria                 | Option                |                       |                       |
|--------------------------|-----------------------|-----------------------|-----------------------|
|                          | 1                     | 2                     | 3                     |
| Side-effect A            | Low risk              | Medium risk           | High risk             |
| Side-effect B            | Low risk              | Low risk              | Medium risk           |
| Benefit                  | Small improvement     | Medium improvement    | Large improvement     |
| Mode of administration   | None                  | Pill                  | Injection             |
| Side-effect C            | Low risk              | Medium risk           | Medium risk           |
| <b>Preferred option?</b> | <input type="radio"/> | <input type="radio"/> | <input type="radio"/> |

The summary shows criteria ordered by importance. The size of row is in accordance to the weight (e.g. side-effect A represents 40% of the total height). The colours represent the scores for each criteria, where white is preferred over dark grey. The default is pre-selected by calculated expected value

**Preferred option:**

|                          | Option                |                       |                       |
|--------------------------|-----------------------|-----------------------|-----------------------|
|                          | 1                     | 2                     | 3                     |
| <b>Preferred option?</b> | <input type="radio"/> | <input type="radio"/> | <input type="radio"/> |

There is no default option

**Preparation for decision making and next steps:**
